# Supplementary material for: Risk of active tuberculosis in migrants diagnosed with cancer: a retrospective cohort study in British Columbia, Canada
Source: HighWire-hosted journal article supplement (doi:10.1136/bmjopen-2020-037827), 2021-03-01
Supplement: bmjopen-2020-037827supp002_data_supplement.pdf [file bmjopen-2020-037827supp002_data_supplement.pdf]

**APPENDIX**

Table A1: Active TB risk amongst patients with Genito-urinary and Gastrointestinal cancers

| <b>TUMOUR SUBGROUP</b>     | <b>Number with Cancer</b> | <b>Number with Active TB</b> | <b>Adjusted HR (95% CI)</b> |
|----------------------------|---------------------------|------------------------------|-----------------------------|
| <b>Genito-Urinary</b>      |                           |                              |                             |
| Bladder                    | 855                       | 0                            | NA                          |
| Prostate                   | 3012                      | 10                           | 1.2 (0.6, 2.3)              |
| Kidney                     | 607                       | 1                            | 1.1 (0.2, 7.8)              |
| <b>Gastrointestinal</b>    |                           |                              |                             |
| Esophagus and stomach      | 918                       | 2                            | 2 (0.5, 8.1)                |
| Large intestine and rectum | 3020                      | 9                            | 2.3 (1.2, 4.4)              |

Liver, Pancreas, Gallbladder, and small intestinal malignancies not shown.

Table A2: Sensitivity analysis, testing models with different population inclusion criteria

| Model # | Model description       | # people deleted (w/ prevalent cancers) | # people included in analysis | # TB cases included in analysis | Adj HR, Lung cancer |
|---------|-------------------------|-----------------------------------------|-------------------------------|---------------------------------|---------------------|
| 1       | Age 15+                 | 2,014                                   | 1,000,764                     | 2,585                           | 11.2 (7.4-16.9)     |
| 2       | Age 30+                 | 2,558                                   | 800,489                       | 2,071                           | 11.2 (7.4-16.9)     |
| 3       | All ages                | 1,961                                   | 1,046,759                     | 2,634                           | 11.5 (7.6-17.4)     |
| 4       | Age 15+, excluding LTBI | 2,010                                   | 995,828                       | 2,575                           | 11.4 (7.5-17.1)     |

Table A3: Active TB risk stratified by TB incidence of country of origin in foreign born individuals with cancer

| <b>Cancer Type</b>      | <b>TB Incidence 0 -100 HR (95% CI)</b> | <b>TB Incidence &gt; 100 HR (95% CI)</b> | <b>All Regions HR (95% CI)</b> |
|-------------------------|----------------------------------------|------------------------------------------|--------------------------------|
| <b>Lung</b>             | 3.1 (0.4, 23.2)                        | 12.4 (8.1, 18.8)                         | 11.2 (7.4, 16.9)               |
| <b>Gastrointestinal</b> | 3.8 (1.2, 12.4)                        | 2.5 (1.5, 4.3)                           | 2.7 (1.7, 4.4)                 |
| <b>Leukemia</b>         | 3.9 (0.5, 29.3)                        | 5.9 (3.1, 11.0)                          | 5.6 (3.1, 10.2)                |
| <b>Lymphoma</b>         | 6.5 (1.5, 27.9)                        | 4.7 (2.5, 8.8)                           | 4.9 (2.7, 8.8)                 |
| <b>Head and Neck</b>    | NA                                     | 1.2 (0.2, 8.8)                           | 1.1 (0.2, 7.9)                 |
| <b>Genitourinary</b>    | NA                                     | 0.4 (0.1, 2.8)                           | 0.3 (0.0, 2.4)                 |
| <b>Other</b>            | NA                                     | 1.3 (0.4, 4.1)                           | 1.2 (0.4, 3.8)                 |
| <b>Sarcoma</b>          | 15.3 (2.1, 109.3)                      | 7.2 (2.7, 19.3)                          | 8.1 (3.3, 19.5)                |
| <b>Skin</b>             | NA                                     | 1.4 (0.3, 6.0)                           | 1.1 (0.2, 4.6)                 |
| <b>Neural</b>           | NA                                     | 2.9 (0.4, 22.1)                          | 2.5 (0.3, 18.9)                |
| <b>Breast</b>           | NA                                     | 1.4 (0.6, 3.1)                           | 1.2 (0.5, 2.6)                 |
| <b>Gynecologic</b>      | 4.2 (1.0, 17.1)                        | NA                                       | 0.5 (0.1, 2.1)                 |
| <b>Prostate</b>         | 2.9 (0.7, 11.7)                        | 1.1 (0.5, 2.1)                           | 1.2 (0.6, 2.3)                 |
| <b>Any Cancer</b>       | 2.7 (1.5, 4.9)                         | 2.4 (1.9, 3.1)                           | 2.5 (2.0, 3.1)                 |

Other: other/unknown cancer type

NA: Not applicable as 0 ATB cases recorded.
